## CORRECTION

# Correction: Smoking is associated with increased risk of cardiovascular events, disease severity, and mortality among patients hospitalized for SARS-CoV-2 infections

Ram Poudel, Lori B. Daniels, Andrew P. DeFilippis, Naomi M. Hamburg, Yosef Khan, Rachel J. Keith, Revanthy Sampath Kumar, Andrew C. Stokes, Rose Marie Robertson, Aruni Bhatnagar

The eighth author's name is spelled incorrectly. The correct name is: Andrew C. Stokes.

## Reference

1. Poudel R, Daniels LB, DeFilippis AP, Hamburg NM, Khan Y, Keith RJ, et al. (2022) Smoking is associated with increased risk of cardiovascular events, disease severity, and mortality among patients hospitalized for SARS-CoV-2 infections. PLoS ONE 17(7): e0270763. <https://doi.org/10.1371/journal.pone.0270763> PMID: 35839264

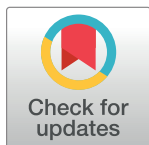

## OPEN ACCESS

**Citation:** Poudel R, Daniels LB, DeFilippis AP, Hamburg NM, Khan Y, Keith RJ, et al. (2025) Correction: Smoking is associated with increased risk of cardiovascular events, disease severity, and mortality among patients hospitalized for SARS-CoV-2 infections. PLoS ONE 20(1): e0318361. <https://doi.org/10.1371/journal.pone.0318361>

**Published:** January 24, 2025

**Copyright:** © 2025 Poudel et al. This is an open access article distributed under the terms of the [Creative Commons Attribution License](https://creativecommons.org/licenses/by/4.0/), which permits unrestricted use, distribution, and reproduction in any medium, provided the original author and source are credited.
